# Supplementary material for: Numerical studies on the Impact of the Last Glacial Cycle on recent borehole temperature profiles: implications for terrestrial energy balance
Source: Copernicus journal article supplement (doi:10.5194/cp-10-1693-2014), 2014-09-10
Supplement: Supplementary file 5 [file cp-10-1693-2014-supplement.zip]

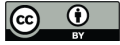

## *Supplement of*

# **Numerical studies on the Impact of the Last Glacial Cycle on recent borehole temperature profiles: implications for terrestrial energy balance**

**H. Beltrami et al.**

*Correspondence to:* H. Beltrami (hugo@stfx.ca)

- Supplement-Cover-Letter.pdf
- LCC\_CP-revised-submission-supplement
  - LCC\_CP-revised-submission-supplement.pdf
  - LCC\_CP-revised-submission-supplement.tex
  - SupFig-3.pdf
  - SupFig-4.pdf
  - authblk.sty
  - copernicus.bst
  - copernicus.cls
  - copernicus2.cls
  - copernicus\_discussions.cls
  - natbib.sty
  - pdfscreen.sty
  - pdfscreenkop.sty
  - timet.sty
- \_\_MACOSX
  - .\_LCC\_CP-revised-submission-supplement
  - LCC\_CP-revised-submission-supplement
    - \* .\_LCC\_CP-revised-submission-supplement.pdf
    - \* .\_LCC\_CP-revised-submission-supplement.tex
    - \* .\_SupFig-3.pdf
    - \* .\_SupFig-4.pdf
    - \* .\_authblk.sty
    - \* .\_copernicus.bst

- \* .\_copernicus.cls
- \* .\_copernicus2.cls
- \* .\_copernicus\_discussions.cls
- \* .\_natbib.sty
- \* .\_pdfscreen.sty
- \* .\_pdfscreencop.sty
- \* .\_timet.sty
