# Supplementary material for: Numerical studies on the Impact of the Last Glacial Cycle on recent borehole temperature profiles: implications for terrestrial energy balance
Source: Copernicus journal article supplement (doi:10.5194/cp-10-1693-2014), 2014-09-10
Supplement: Supplementary file 6 [file cp-10-1693-2014-supplement.zip]

# **A numerical study of the impact of the Last Glacial Cycle on Late-Holocene temperature and energy reconstructions from terrestrial borehole temperatures in North America: Supplementary material**

Hugo Beltrami<sup>1,6</sup>, Gurpreet S. Matharoo<sup>1</sup>, Lev Tarasov<sup>2</sup>, Volker Rath<sup>3,4</sup>, and Jason E. Smerdon<sup>5</sup>

<sup>1</sup>Climate & Atmospheric Sciences Institute and Department of Earth Sciences, St. Francis Xavier University, Antigonish, Nova Scotia, Canada.

<sup>2</sup>Department of Physics and Physical Oceanography, Memorial University of Newfoundland, St. John's, Newfoundland, Canada.

<sup>3</sup>Universidad Complutense de Madrid, Facultad CC. Físicas, Departamento de Astrofísica y CC de la Atmósfera, Madrid, Spain

<sup>4</sup>Dublin Institute for Advanced Studies, School of Cosmic Physics, Geophysics Section, Dublin, Ireland

<sup>5</sup>Lamont-Doherty Earth Observatory, Columbia University, Palisades, New York, USA

<sup>6</sup>Centre pour l'étude et la simulation du climat à l'échelle régionale (ESCER), Université du Québec à Montréal, Montréal, Québec, Canada

In this supplement we present some additional figures, which extend the results shown in the main text for the uppermost 600 m to depths of 2000 m. Figure 1 shows the spatial distribution of the perturbation of the heat flux over the full domain. Each panel in this Figure shows heat flux perturbations for the depth ranges 30-500 m, 500-1000 m, 1000-1500 m, and 1500-2000 m, respectively, while Figure 2 plots the widths of the 75% confidence intervals for the heat flux perturbations. Most of the mean heat flux perturbations are restricted to the first kilometer of the subsurface. This depth range spans the typical depth of BTPs used for borehole paleoclimatic studies. It is therefore important to estimate the impact of the LGC perturbations on GST and heat flow estimates from boreholes.

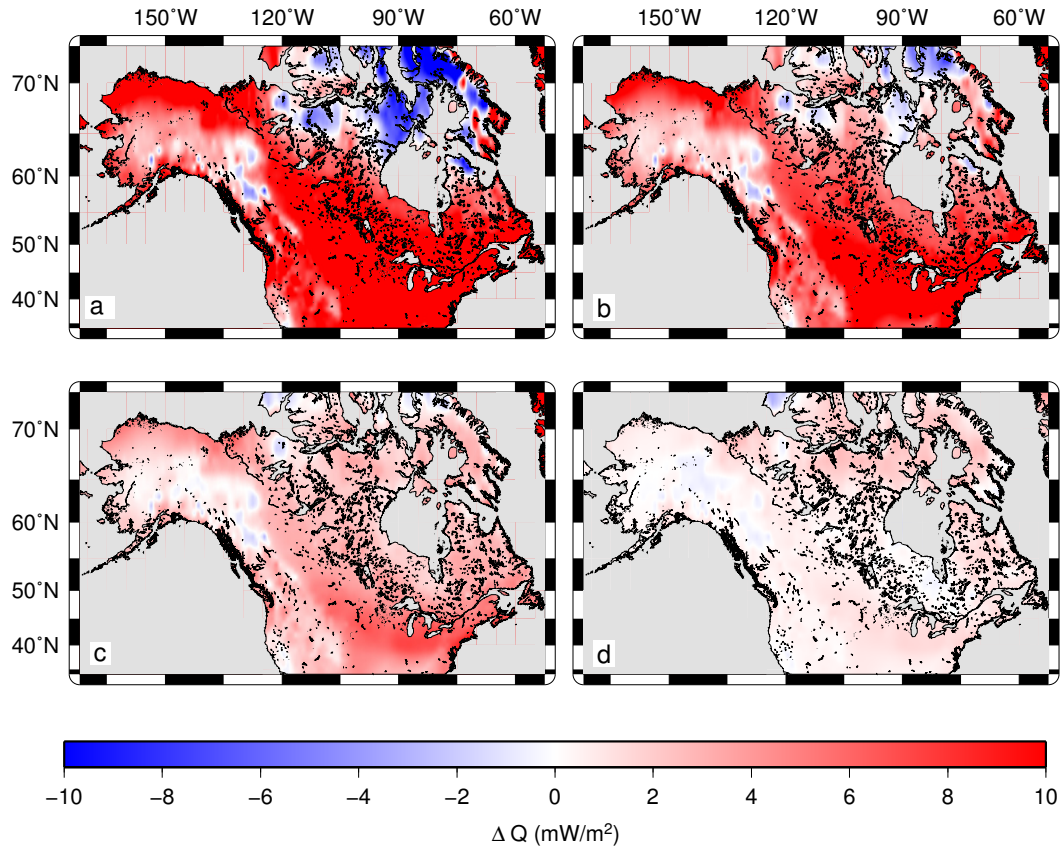

**Fig. 1.** Spatial distribution of the average perturbation of the heat flux for depth intervals ranging from (a) 30 m–500 m, (b) 500 m–1000 m, (c) 1000 m–1500 m, and (d) 1500 m–2000 m. Positive values represent ground energy gain.

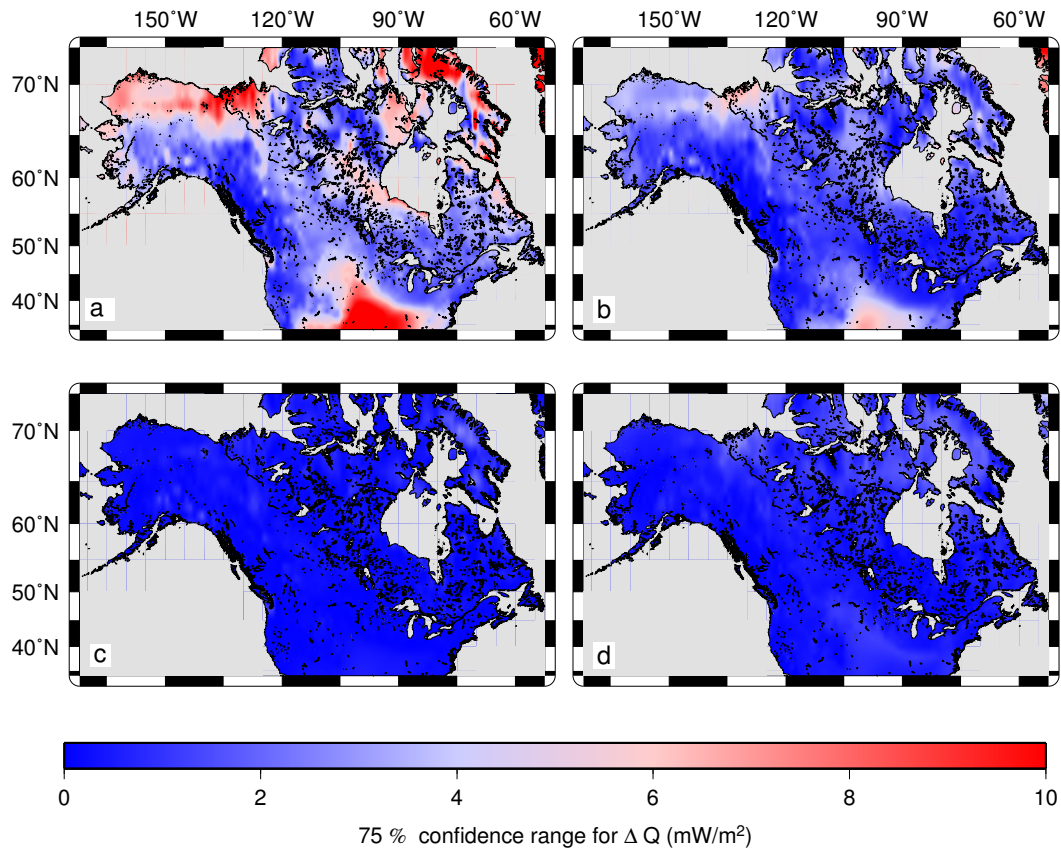

**Fig. 2.** Spatial distribution of the 75% confidence interval for the mean perturbation of the heat flux for depth intervals ranging from (a) 30 m–500 m, (b) 500 m–1000 m, (c) 1000 m–1500 m, and (d) 1500 m–2000 m.
