# Supplementary figures and images for: Numerical studies on the Impact of the Last Glacial Cycle on recent borehole temperature profiles: implications for terrestrial energy balance
Source: Copernicus journal article supplement (doi:10.5194/cp-10-1693-2014), 2014-09-10

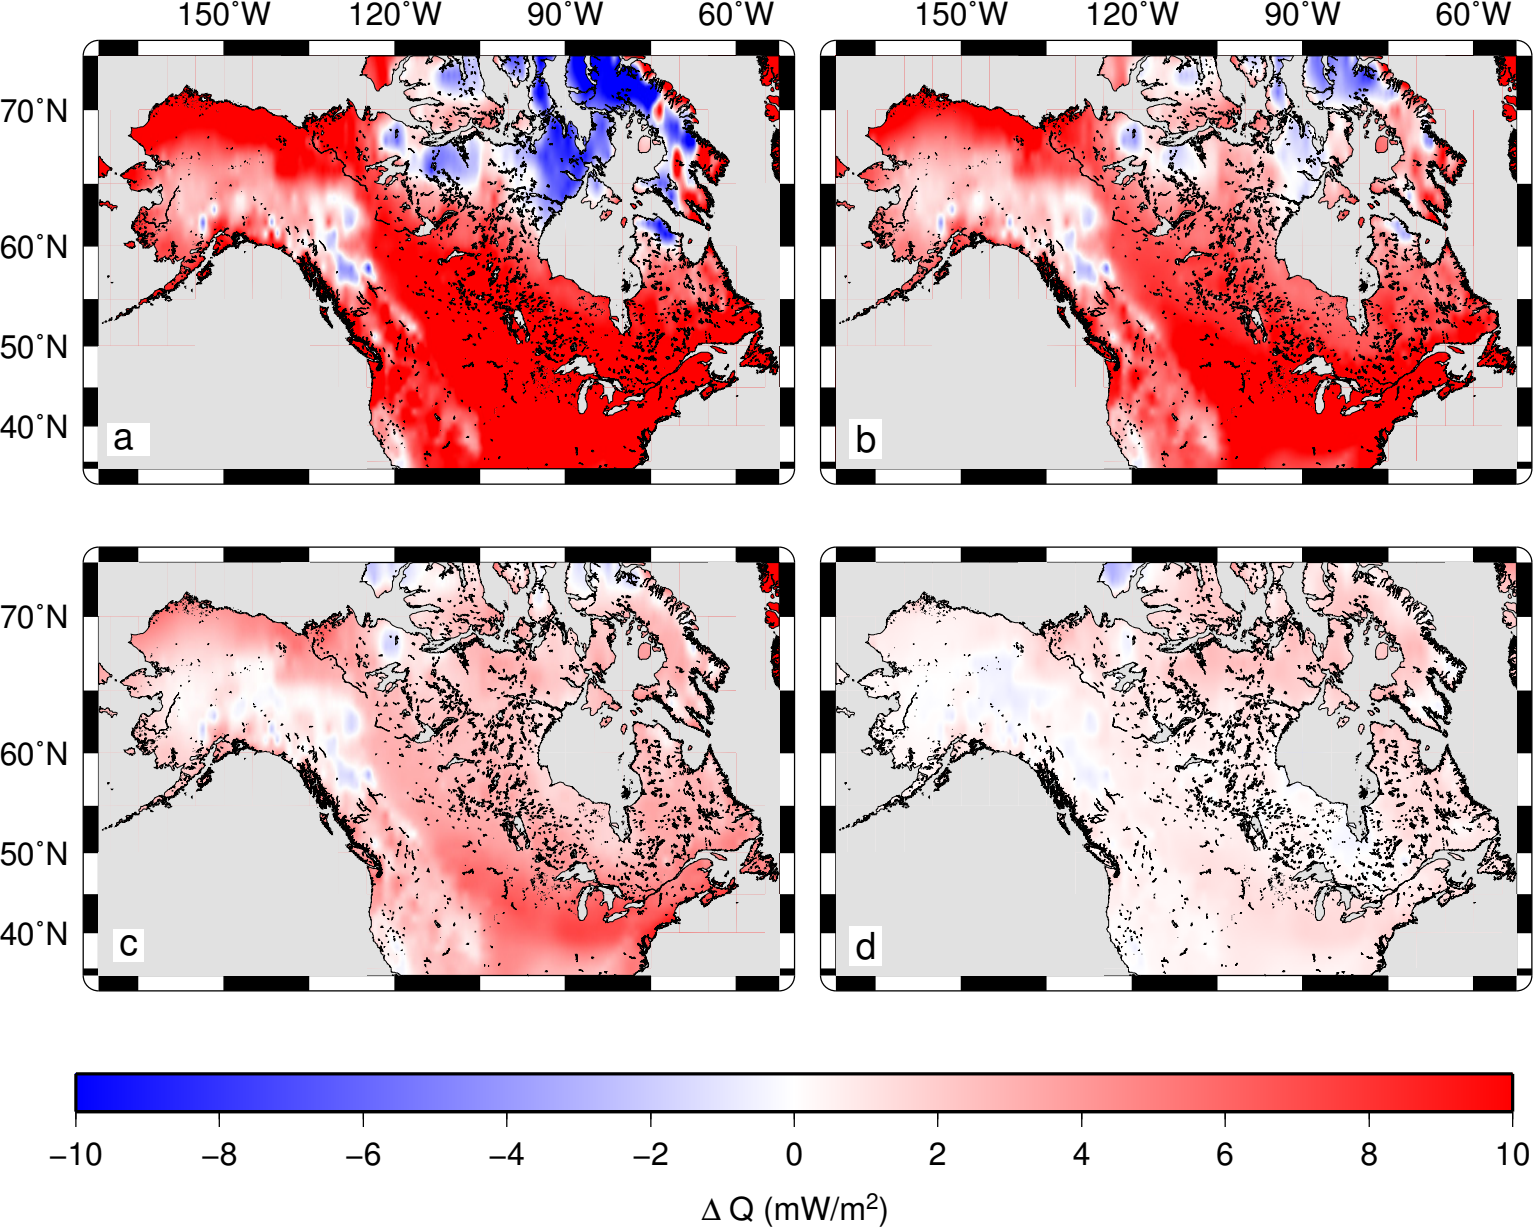

Supplement: Supplementary file 1 [file cp-10-1693-2014-supplement.zip]

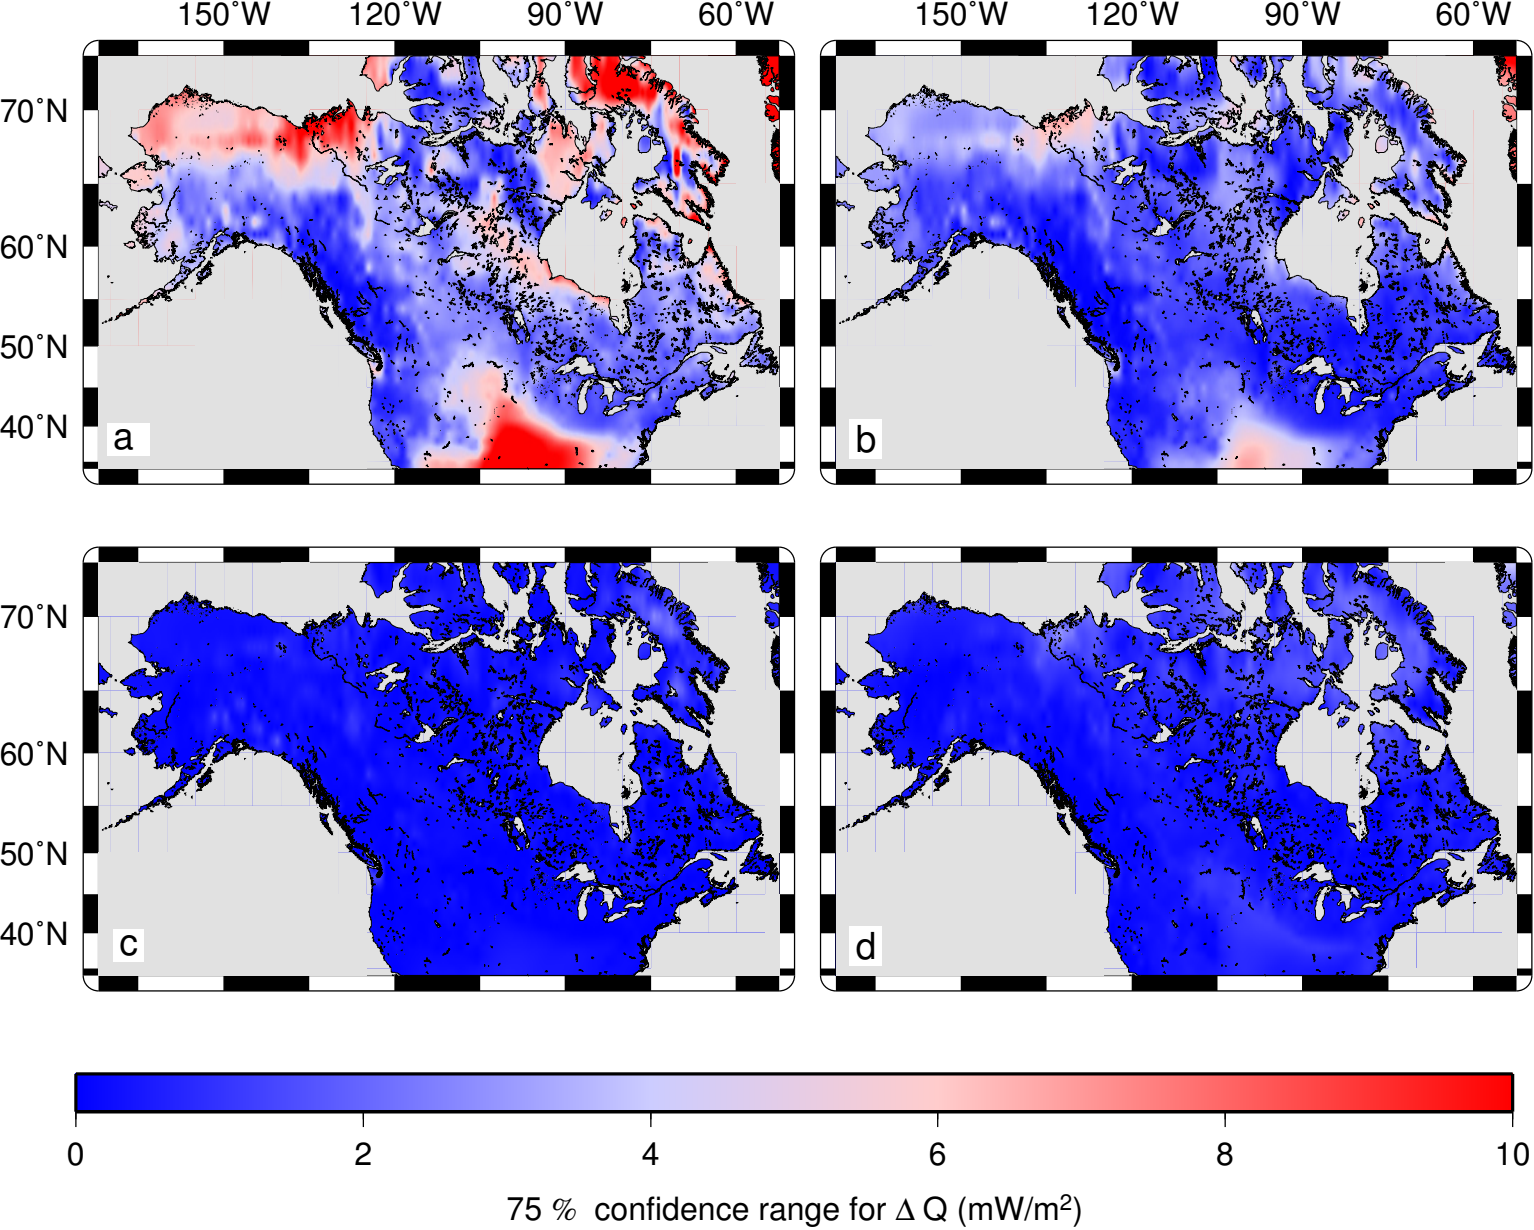

Supplement: Supplementary file 4 [file cp-10-1693-2014-supplement.zip]
